# Supplementary material for: Evaluation and comparison of most prevalent artifact reduction methods for EEG acquired simultaneously with fMRI
Source: Frontiers journal article supplement (doi:10.3389/fnimg.2022.968363), 2022-08-29
Supplement: Data_Sheet_1.PDF [file Data_Sheet_1.PDF]

# Supplementary Material

## 1 SUPPLEMENTARY METHODS

### 1.1 Statistical Inference

#### 1.1.1 Spectral Content Analyses (RS and Finger Tapping) and SNR on Single Trials

The group-level analyses of all spectral changes, resting-state occipital alpha and motor-related central oscillatory activity, and for the estimation of the SNR on single trials were performed with a Bayesian normal two-level regression model with varying-intercept and varying-slope across groups S1. We reparametrized the model to noncentered parametrization to achieve stable convergence. The model was specified and numerically estimated using the probabilistic programming language Stan (Team, 2022).

$$\begin{aligned}
 y_i &\sim \text{Normal}(X_i \beta_{\text{participant}[i]}, \sigma_{\text{method}[i]}) \\
 \beta_{\text{participant}} &\sim \text{Normal}(\beta, \Sigma) \\
 \beta &\sim \text{Normal}(0, 10) \\
 \Sigma &= \text{var}(\beta) \Omega \text{var}(\beta) \\
 \text{var}(\beta) &\sim \text{Half-Cauchy}(0, 2.5) \\
 \Omega &\sim \text{LKJcorr}(2) \\
 \sigma_{\text{method}} &\sim \text{Half-Cauchy}(0, 2.5),
 \end{aligned}
 \tag{S1}$$

where  $y$  is the outcome variable,  $X$  is the design matrix,  $\beta_{\text{participant}}$  is the vector of regression coefficients of each participant,  $\beta$  is the vector of regression coefficients at the group-level,  $\Sigma$  is the covariance matrix of the regression coefficients,  $\sigma_{\text{method}}$  is a vector of standard deviations of the residuals defined for each artifact reduction method, and  $\Omega$  is the correlation matrix of the regression coefficients.

#### 1.1.2 Within-Participants Effect Size Analysis

For the estimation of the posterior distribution of within-participants effect sizes of the difference between the contralateral and ipsilateral VEP responses, we implemented a model shown in S2. We modeled the standard deviation of the residuals with a two-level structure, where we estimated one standard deviation parameter for each participant and each method, pooled from five group-level standard deviations corresponding to the variability of residuals of each method within participants.

$$\begin{aligned}
y_i &\sim \text{Normal}(X_i \beta_{\text{participant}[i]}, \sigma_{\text{participant,method}[i]}) \\
\beta_{\text{participant}} &\sim \text{Normal}(\beta, \Sigma) \\
\beta &\sim \text{Normal}(0, 10) \\
\Sigma &= \text{var}(\beta) \Omega \text{var}(\beta) \\
\text{var}(\beta) &\sim \text{Half-Cauchy}(0, 2.5) \\
\Omega &\sim \text{LKJcorr}(2) \\
\sigma_{\text{participant,method}} &\sim \text{Half-Normal}(\sigma_{\text{method}}, \sigma_{\sigma}) \\
\sigma_{\text{method}} &\sim \text{Half-Cauchy}(0, 2.5) \\
\sigma_{\sigma} &\sim \text{Half-Cauchy}(0, 2.5),
\end{aligned} \tag{S2}$$

where  $y$  is the outcome variable,  $X$  is the design matrix,  $\beta_{\text{participant}}$  is the vector of regression coefficients of each participant,  $\beta$  is the vector of regression coefficients at the group-level,  $\Sigma$  is the covariance matrix of the regression coefficients,  $\sigma_{\text{method, participant}}$  is a vector of standard deviations of the residuals of each artifact reduction method and participant,  $\sigma_{\text{method}}$  is the group-level estimate of residuals of each method,  $\sigma_{\sigma}$  is the standard deviation of the group-level method standard deviations, and  $\Omega$  is the correlation matrix of the regression coefficients.

### 1.1.3 Across-Participants Effect Size Analysis and SNR on Participant Averages

Across-participants effect sizes of the contralateral–ipsilateral difference of the VEP responses and SNR on VEP participant-averages were estimated for each method separately. The inference was conducted with a single-level normal linear regression model S3.

$$\begin{aligned}
y_i &\sim \text{Normal}(\mu_{\text{method}}, \sigma_{\text{method}}) \\
\mu_{\text{method}} &\sim \text{Normal}(0, 10) \\
\sigma_{\text{method}} &\sim \text{Half-Cauchy}(0, 2.5),
\end{aligned} \tag{S3}$$

where  $y$  is the outcome variable,  $\mu_{\text{method}}$  is the vector of mean signal-to-noise ratio/mean VEP difference of each method, and  $\sigma_{\text{method}}$  is the vector of standard deviations of signal-to-noise ratio/mean VEP difference of each method.

### 1.1.4 VEP Correlations

The correlation analysis of grand-average VEP responses for each of the four stimuli was estimated from the covariance of the bivariate Student's t-distribution, which is more robust to outliers than the normal distribution as assumed when computing Pearson correlation coefficients (Baez-Ortega, 2018; Bååth, 2013). Correlations were estimated with the model S4.

$$\begin{aligned}
\mathbf{y}_i &\sim \mathbf{t}_\nu(\boldsymbol{\mu}, \boldsymbol{\Sigma}) \\
\boldsymbol{\Sigma} &= \begin{bmatrix} \sigma_1^2 & \sigma_1\sigma_2\rho \\ \sigma_1\sigma_2\rho & \sigma_2^2 \end{bmatrix} \\
\sigma_1, \sigma_2 &\sim \text{Half-Cauchy}(0, 2.5) \\
\boldsymbol{\mu} &\sim \text{Normal}(0, 100) \\
\nu &\sim \Gamma(2, 0.1),
\end{aligned} \tag{S4}$$

where  $y_i$  is a set of two two-dimensional vectors,  $\boldsymbol{\Sigma}$  is the covariance matrix,  $\sigma_1$  and  $\sigma_2$  are the standard deviations of each input vector,  $\boldsymbol{\mu}$  is the vector of means,  $\rho$  is the correlation coefficient, and  $\nu$  is the degrees of freedom parameter.

## 1.2 Carbon-Wire Loop System

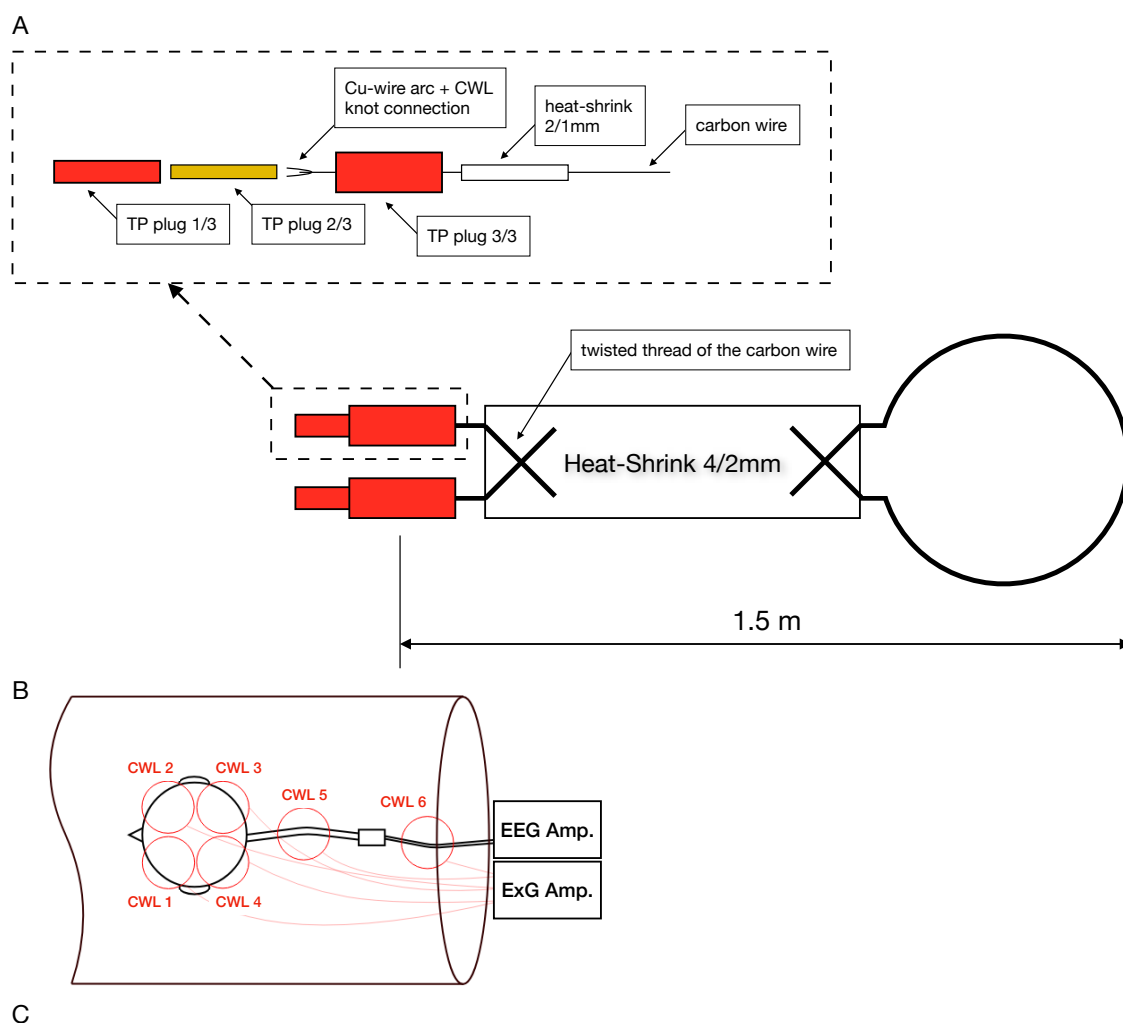

Required Materials

|                              | 1 CWL | 6 CWL |
|------------------------------|-------|-------|
| Insulated carbon wires [m]   | 3     | 18    |
| Touch-proof plugs            | 2     | 12    |
| Heat-shrink tubing 4/2mm [m] | 1.5   | 9     |
| Heat-shrink tubing 2/1mm [m] | 0.2   | 1.2   |
| Solid core Cu wire [m]       | 0.05  | 0.3   |

**Figure S1. Carbon-Wire Loop Construction and Materials.** (A) A single carbon-wire loop (CWL) construction. (B) CWL system consisted of six CWLs connected to a bipolar amplifier (BrainAmp ExG, Brain Products GmbH, Gilching, Germany) with touch-proof (TP) plugs. Four CWLs were attached to the EEG cap and two CWLs to the leads connecting the cap to the amplifier. (C) A list of required materials for the construction of a single CWL and the entire set of six CWLs. The CWL system was designed according to van der Meer et al. (2016).

## 2 SUPPLEMENTARY ANALYSES

### 2.1 Motion-Induced Spectral Activity Analysis

Motion-induced spectral activity in the three frequency bands (alpha: 8–12 Hz, beta: 15–25 Hz, and gamma: 70–80 Hz) was estimated with the model shown in S5.

$$\begin{aligned}
 y_i &\sim \text{Normal}(\mu_{\text{participant}[i]}, \sigma) \\
 \mu_{\text{participant}} &\sim \text{Normal}(\mu_\mu, \sigma_\mu) \\
 \mu_\mu &\sim \text{Normal}(0, 5) \\
 \sigma_\mu &\sim \text{Half-Cauchy}(0, 2.5) \\
 \sigma &\sim \text{Half-Cauchy}(0, 2.5),
 \end{aligned} \tag{S5}$$

where  $y$  is the outcome variable, the mean power spectral density difference between finger-tapping and rest periods ( $\Delta\text{PSD}$ ),  $\mu_{\text{participant}}$  is the vector of  $\Delta\text{PSDs}$  of each participant,  $\mu_\mu$  and  $\sigma_\mu$  are the group-level mean and standard deviation parameters (hyperparameters of  $\mu_{\text{participant}}$ ), respectively, and  $\sigma$  is the standard deviation of the residuals on the first level.

The group-level posterior mean of the  $\Delta\text{PSD}$  of the average signal of all four CWLs attached to participants' heads was estimated as (i) 0.501 dB/Hz (95% interval: 0.152–0.837 dB/Hz) for the alpha band (8–12 Hz), (ii) 0.595 dB/Hz (95% interval: 0.157–1.07 dB/Hz) for the beta band (15–25 Hz), and (iii) –0.0513 dB/Hz (95% interval: –0.311–0.211 dB/Hz) for the gamma band (70–80 Hz).

### 3 SUPPLEMENTARY FIGURES

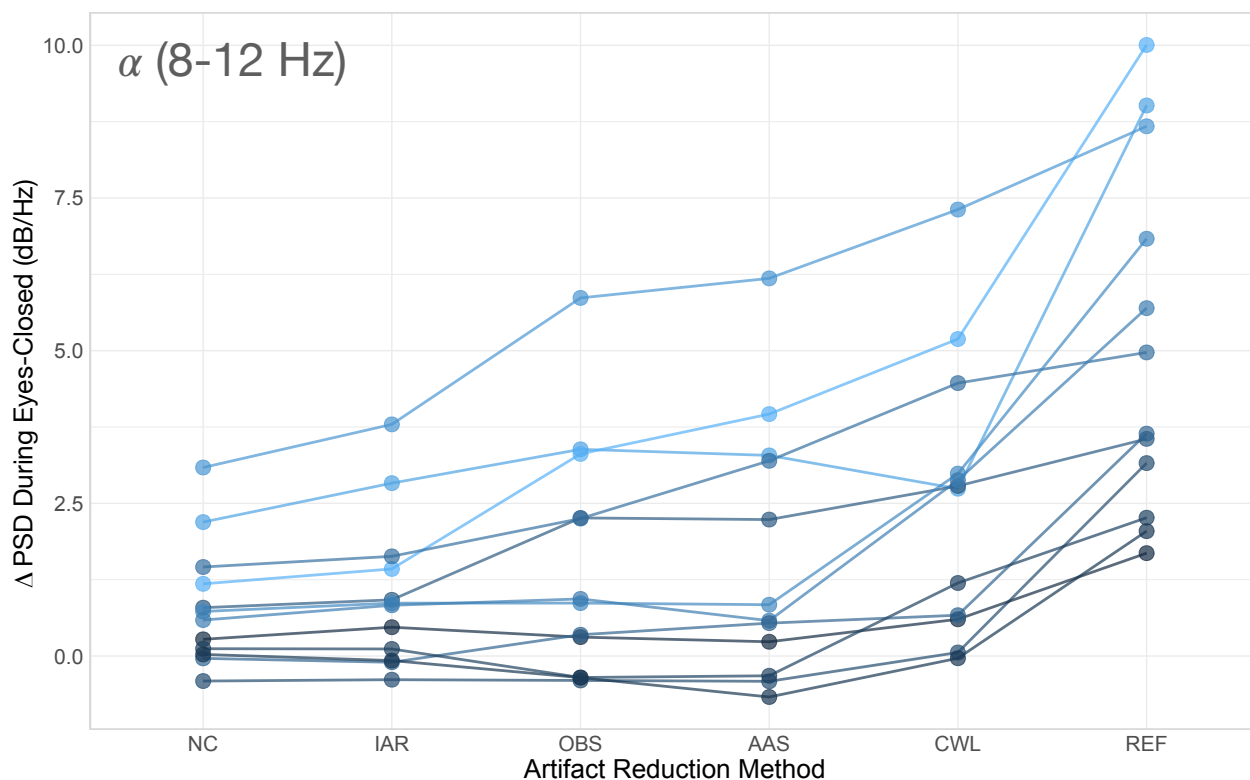

**Figure S2. Resting-State Power Spectral Density Changes.** Changes in mean power spectral density ( $\Delta$ PSD) between the eyes-open (EO) and eyes-closed (EC) blocks in the resting state task for every participant and every dataset. **NC** – non-corrected signal, **IAR** – data with the imaging artifact reduced, **OBS** – data with IAR and reduced BCG artifacts with optimal basis set, **AAS** – data with IAR and reduced BCG artifacts with average artifact subtraction, **CWL** – data with IAR and carbon-wire loop artifact correction, **REF** – data collected outside of the MRI environment

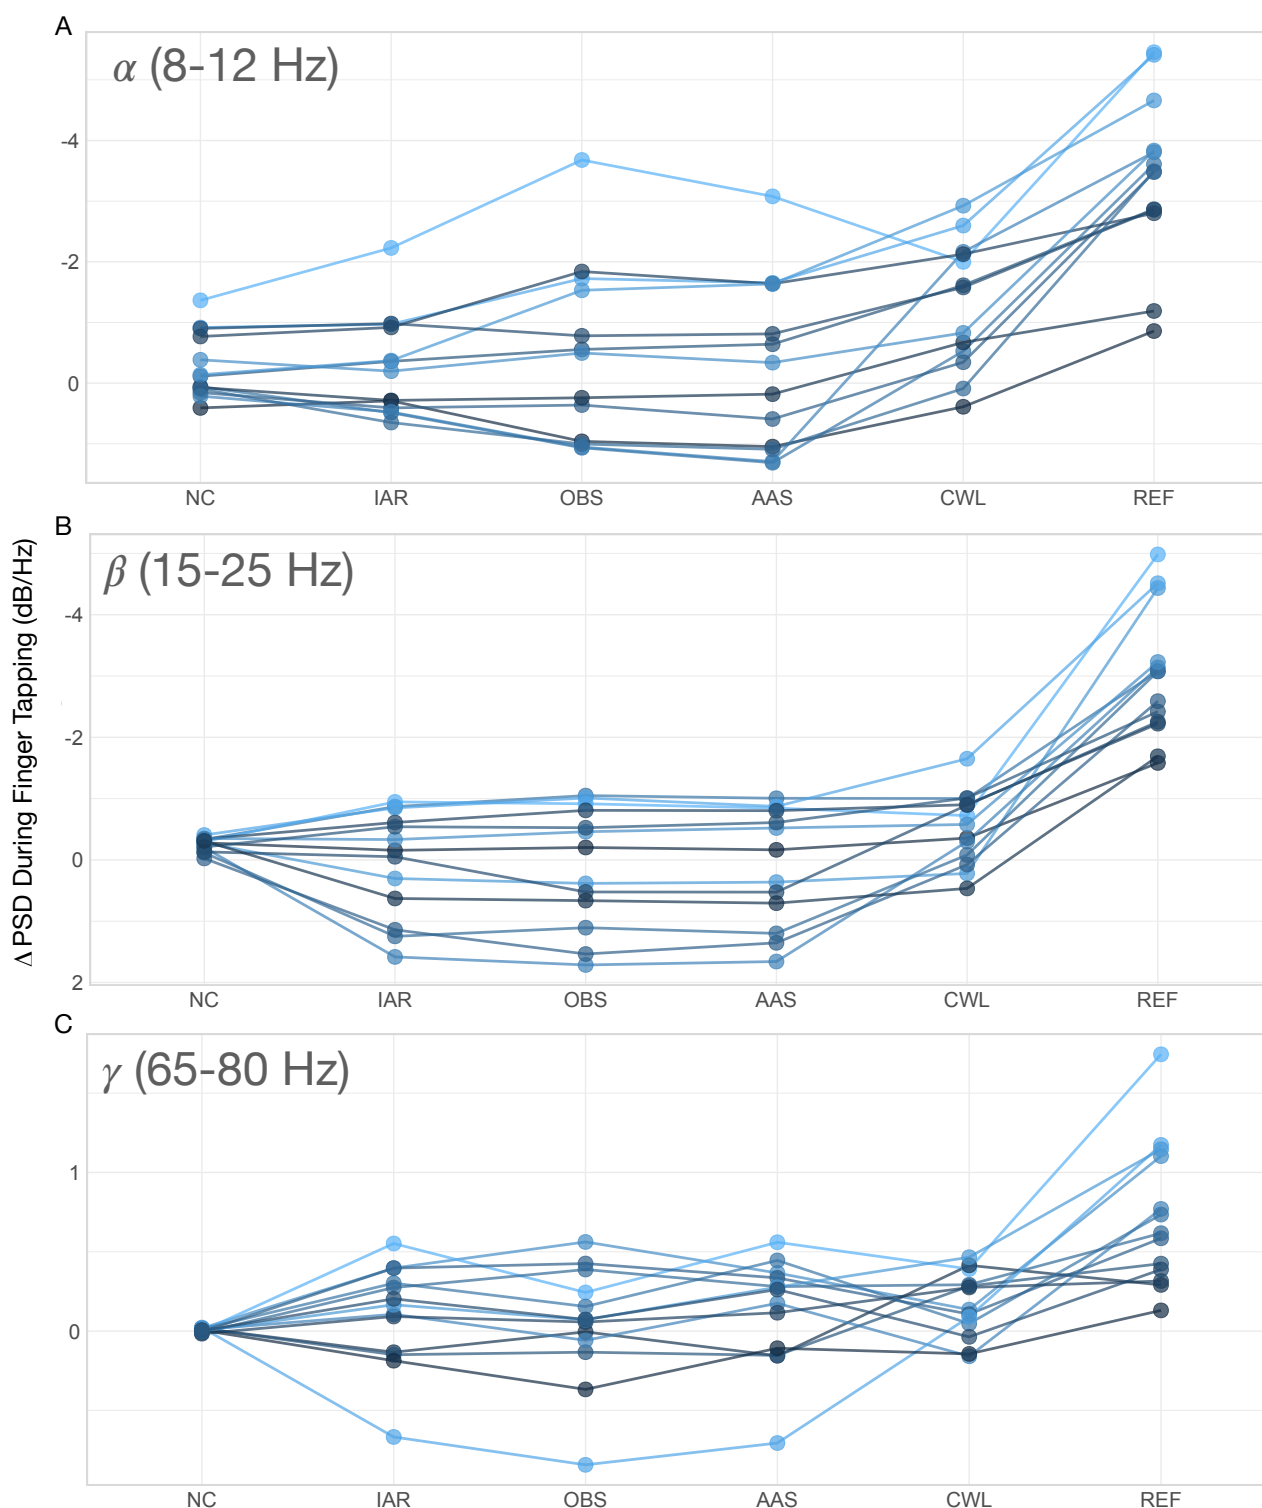

**Figure S3. Finger Tapping Power Spectral Density Changes.** Changes in mean power spectral density ( $\Delta$ PSD) during finger tapping for every participant and every dataset in the (A) alpha, (B) beta and (C) gamma band. **NC** – non-corrected signal, **IAR** – data with the imaging artifact reduced, **OBS** – data with IAR and reduced BCG artifacts with optimal basis set, **AAS** – data with IAR and reduced BCG artifacts with average artifact subtraction, **CWL** – data with IAR and carbon-wire loop artifact correction, **REF** – data collected outside of the MRI environment

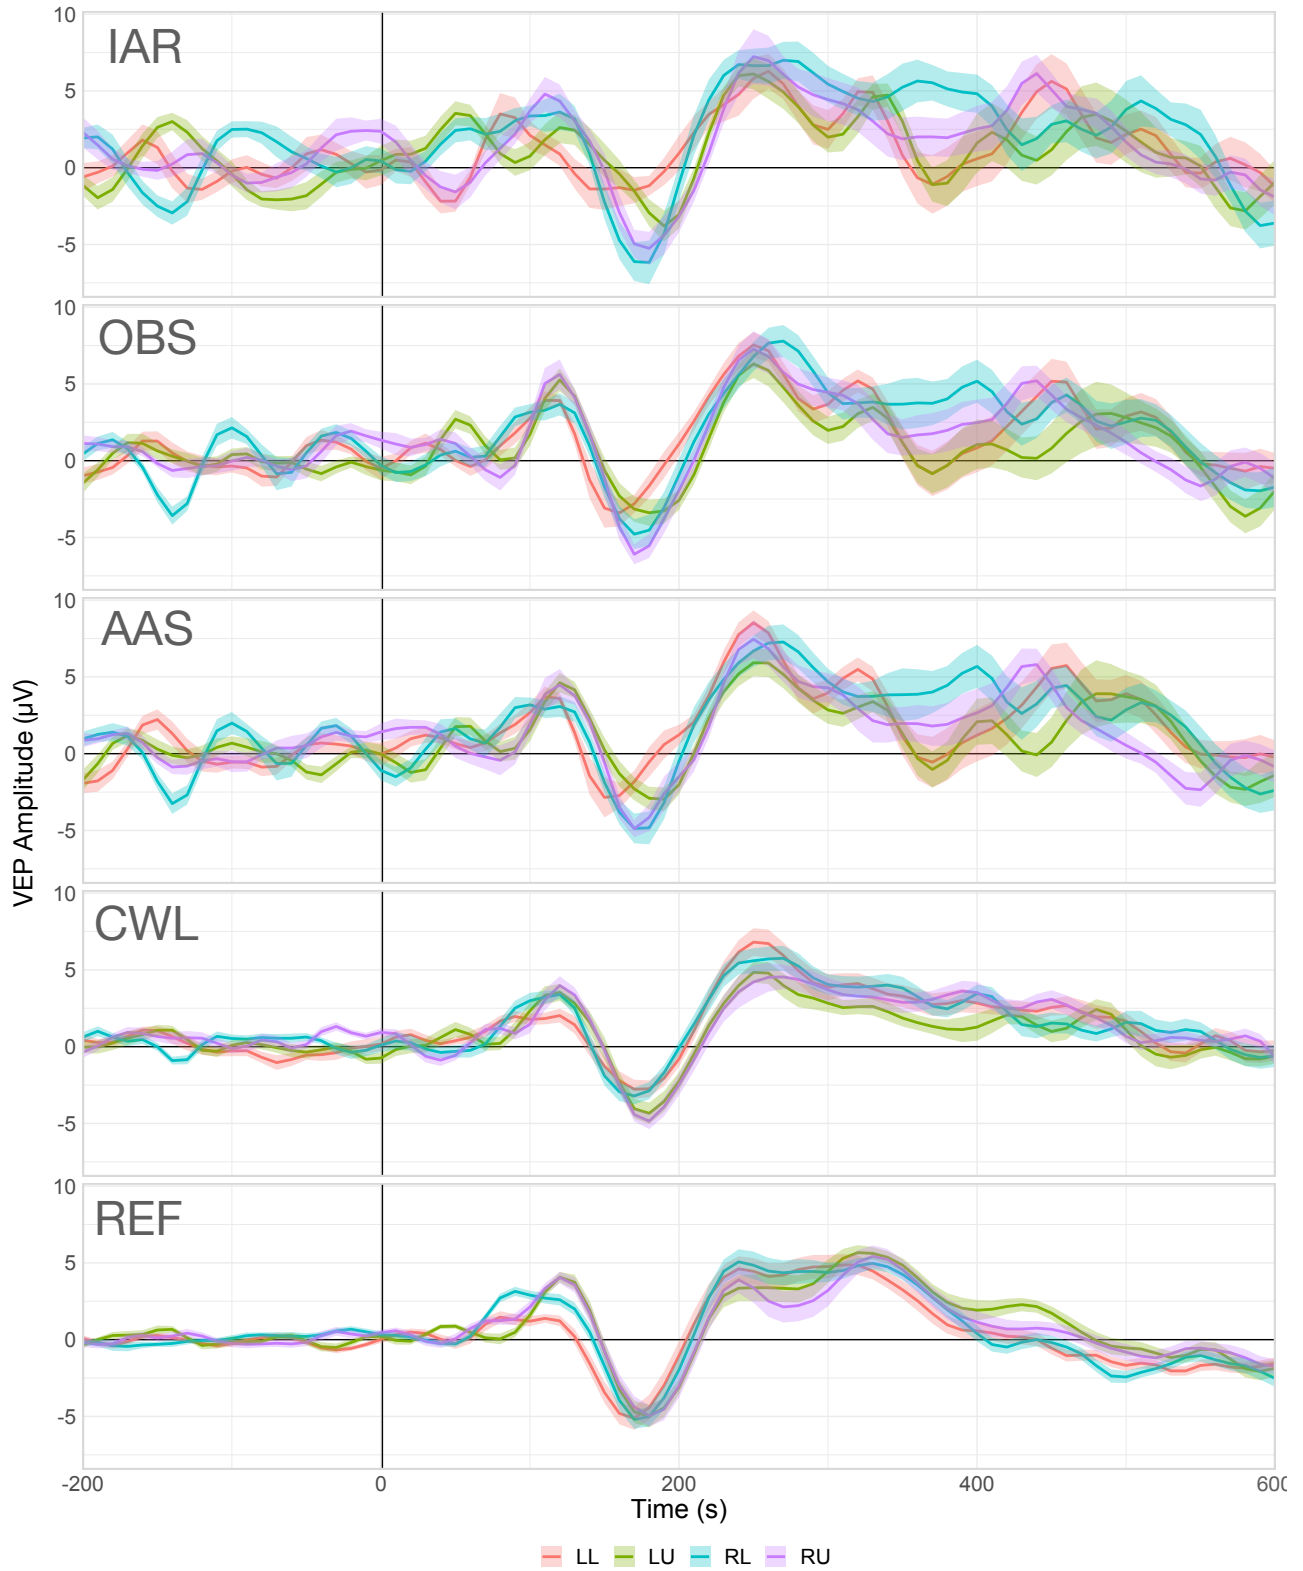

**Figure S4. Grand-Average VEP.** Grand-average visual-evoked potentials (VEP) from the checkerboard task for every data variant and every stimulus location (LL, LU, RL, RU). The ribbons indicate  $\pm 2$  between-participants standard errors. **LL** – left lower, **LU** – left upper, **RL** – right lower, **RU** – right upper, **IAR** – data with the imaging artifact reduced, **OBS** – data with IAR and reduced BCG artifacts with optimal basis set, **AAS** – data with IAR and reduced BCG artifacts with average artifact subtraction, **CWL** – data with IAR and carbon-wire loop artifact correction, **REF** – data collected outside of the MRI environment



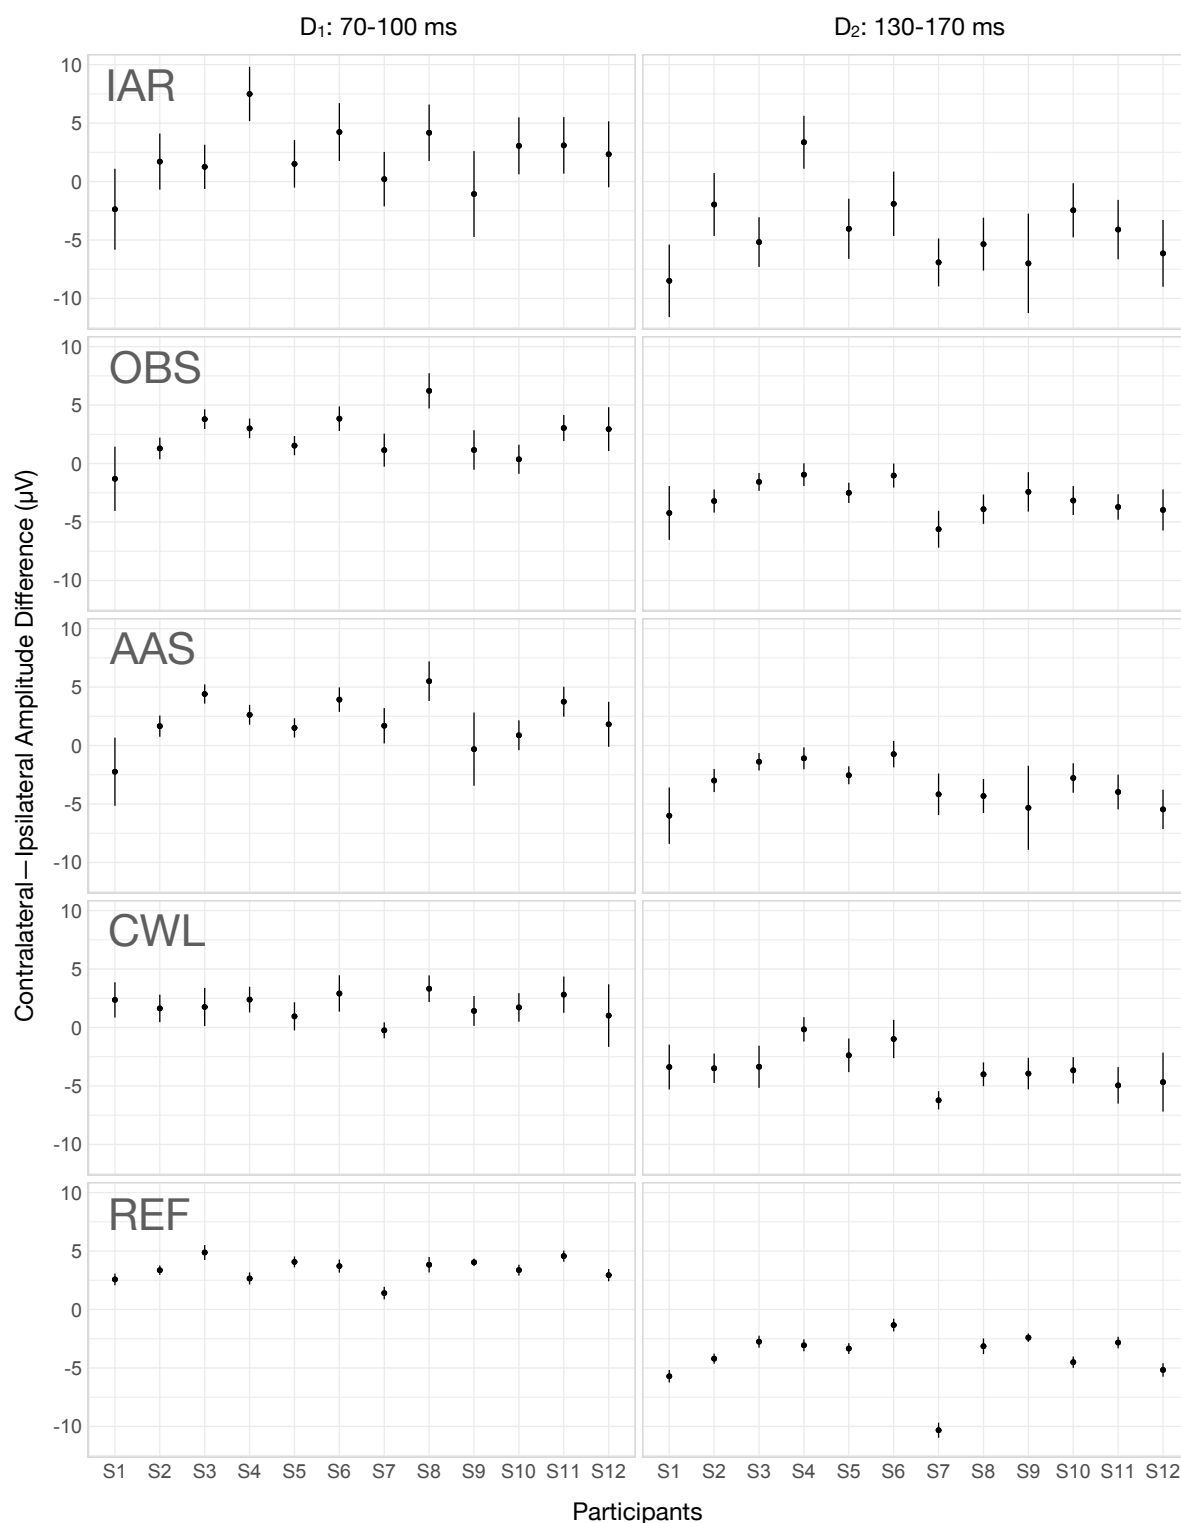

**Figure S5. Within-Participants and Between-Participants Variability of the Mean Difference Wave Amplitude.** Within-participants and between participants variability of the mean amplitude of the two examined peaks of the difference wave between the contralateral and ipsilateral participant-average VEP ( $D_1$ : 70–100 ms and  $D_2$ : 130–170 ms) for every participant and every data variant. **NC** – non-corrected signal, **IAR** – data with the imaging artifact reduced, **OBS** – data with IAR and reduced BCG artifacts with optimal basis set, **AAS** – data with IAR and reduced BCG artifacts with average artifact subtraction, **CWL** – data with IAR and carbon-wire loop artifact correction, **REF** – data collected outside of the MRI environment

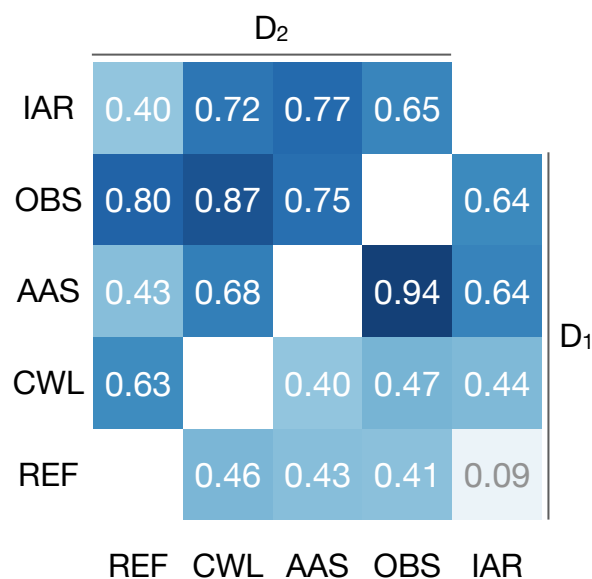

**Figure S6. Correlations of Participants' Mean Difference Wave Peak Amplitudes.** The correlation matrix of participant's mean difference wave peak amplitudes between data variants. The upper-left matrix contains correlations of the  $D_2$  peak (130–170 ms), the lower-right matrix contains correlations of the  $D_1$  peak (70–100 ms). **IAR** – data with the imaging artifact reduced, **OBS** – data with IAR and reduced BCG artifacts with optimal basis set, **AAS** – data with IAR and reduced BCG artifacts with average artifact subtraction, **CWL** – data with IAR and carbon-wire loop artifact correction, **REF** – data collected outside of the MRI environment

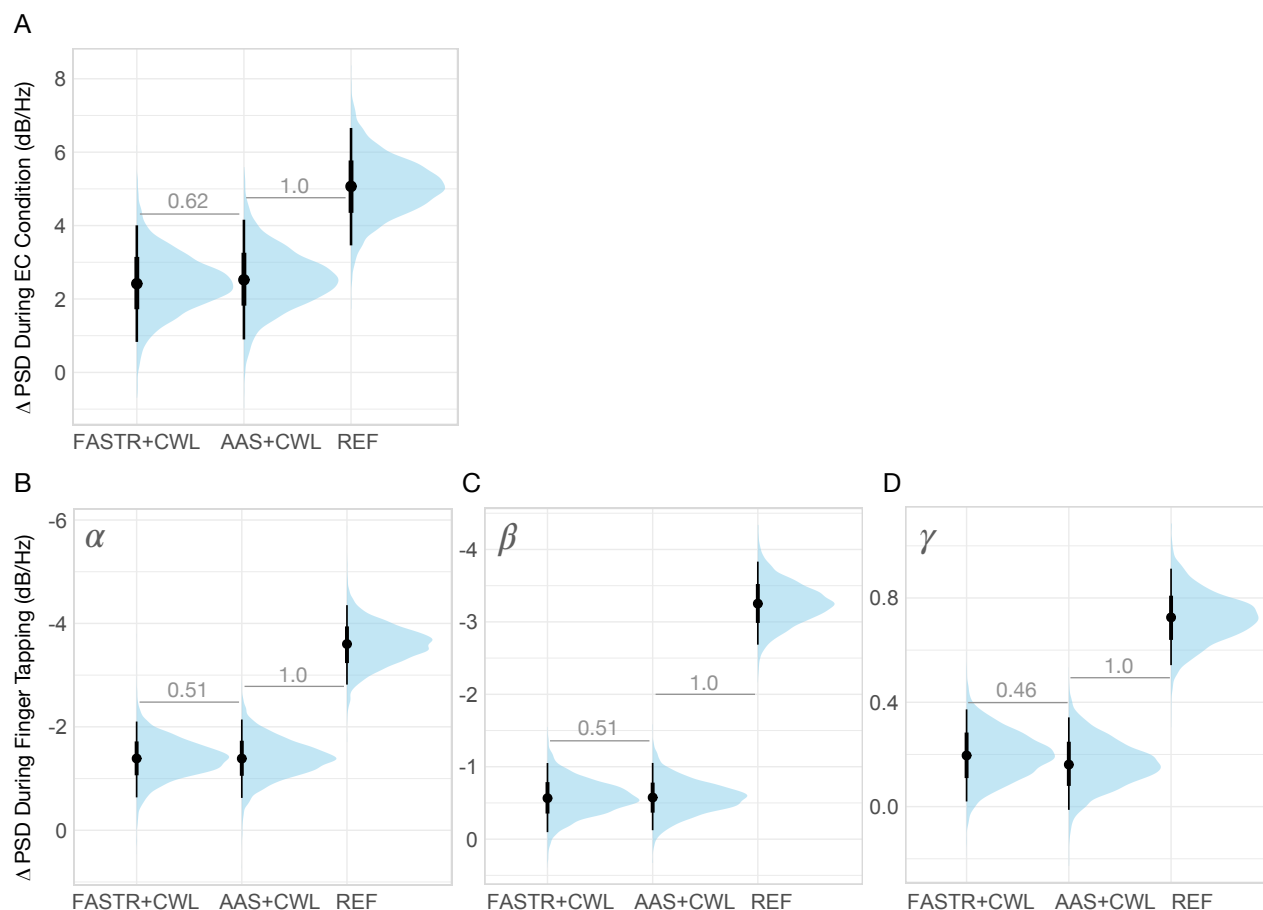

**Figure S7. A Posteriori Spectral Analyses.** (A) Posterior distributions of the group-level difference in mean PSD ( $\Delta$ PSD) in the alpha band between EC and EO conditions for the FASTR+CWL, AAS+CWL, and REF datasets. The distributions are summarized with the median estimates and 66%-95% intervals. (B), (C) and (D) Posterior distributions of the group-level  $\Delta$ PSD in the alpha, beta and gamma bands, respectively, for the FASTR+CWL, AAS+CWL, and REF datasets. The distributions are summarized with the median estimates and 66% and 95% intervals. Numbers between adjacent intervals depict the probability of the data variant on the right producing a larger  $\Delta$ PSD than the one on the left, controlling for participant variability. **AAS+CWL** – data with imaging artifacts reduced using average artifact subtraction (AAS) and BCG artifacts reduced with carbon-wire loop (CWL) artifact correction, **FASTR+CWL** – data with imaging artifacts reduced using fMRI Artifact Slice Template Removal (FASTR) and BCG artifacts reduced with CWL artifact correction **REF** – data collected outside of the MRI environment

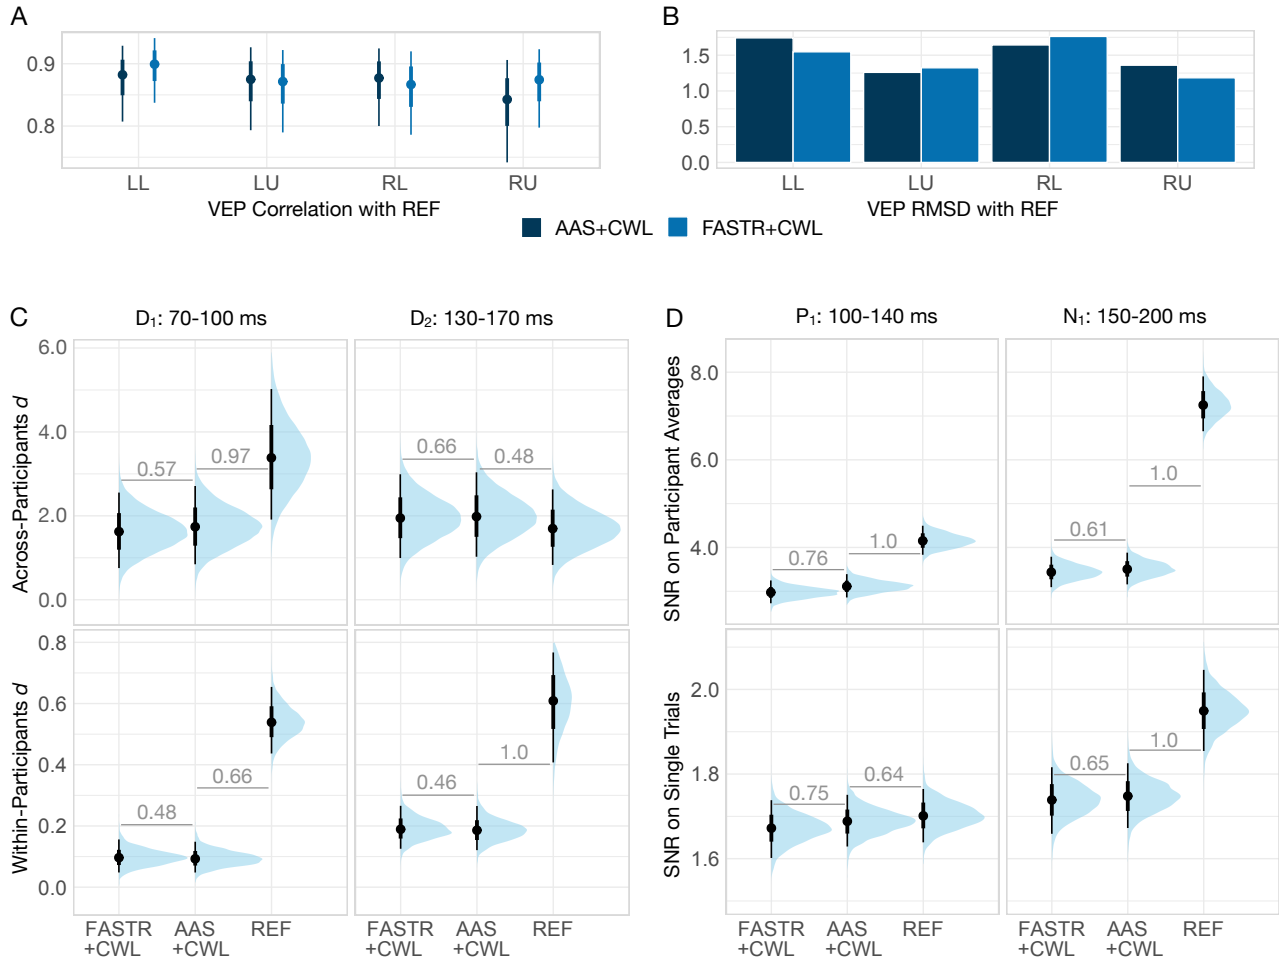

**Figure S8. A Posteriori ERP Analyses.** Posterior distributions of correlation coefficients (**A**) and root-mean-square deviations (RMSD) (**B**) between the grand-average VEP of FASTR+CWL and AAS+CWL data variants with the grand-average VEP of data collected outside of the MRI environment (REF) for each type of visual stimulus. Correlation distributions are represented with median estimates and 66%-95% intervals. (**C**) Posterior distributions of the across-participants effect size of both difference (D<sub>1</sub> and D<sub>2</sub>) peaks (top row) and the posterior distribution of the group-average of within-participants effect sizes (bottom row). (**D**) Posterior distributions of SNR of both VEP peaks (P<sub>1</sub> and P<sub>2</sub>) computed on participant averages (top row) and on single trials (bottom row). The distributions are summarized with median estimates and 66%-95% intervals. Numbers between adjacent intervals depict the probability of the method on the right producing a larger effect size/SNR than the method on the left, accounting for participant differences. **AAS+CWL** – data with imaging artifacts reduced using average artifact subtraction (AAS) and BCG artifacts reduced with carbon-wire loop (CWL) artifact correction, **FASTR+CWL** – data with imaging artifacts reduced using fMRI Artifact Slice Template Removal (FASTR) and BCG artifacts reduced with CWL artifact correction **REF** – data collected outside of the MRI environment

---

## REFERENCES

- Bååth, R. (2013). The Bayesian Counterpart of Pearson's Correlation Test. *Publishable Stuff - Rasmus Bååth's Research Blog*
- Baez-Ortega, A. (2018). Bayesian robust correlation with Stan in R (and why you should use Bayesian methods). *in silico - Naïve thoughts on data*
- Team, S. D. (2022). Stan Modeling Language Users Guide and Reference Manual
- van der Meer, J. N., Pampel, A., Van Someren, E. J., Ramautar, J. R., van der Werf, Y. D., Gomez-Herrero, G., et al. (2016). Carbon-wire loop based artifact correction outperforms post-processing EEG/fMRI corrections—A validation of a real-time simultaneous EEG/fMRI correction method. *NeuroImage* 125, 880–894. doi:10/f74g39
